# Supplementary material for: Synthesis of monodisperse spherical silica particles with solid core and mesoporous shell: mesopore channels perpendicular to the surface
Source: Royal Society of Chemistry journal article supplement (doi:10.1039/b617471j), 2007-01-01
Supplement: b617471j.pdf [file b617471j.pdf]

## Electronic Supplementary Information (ESI)

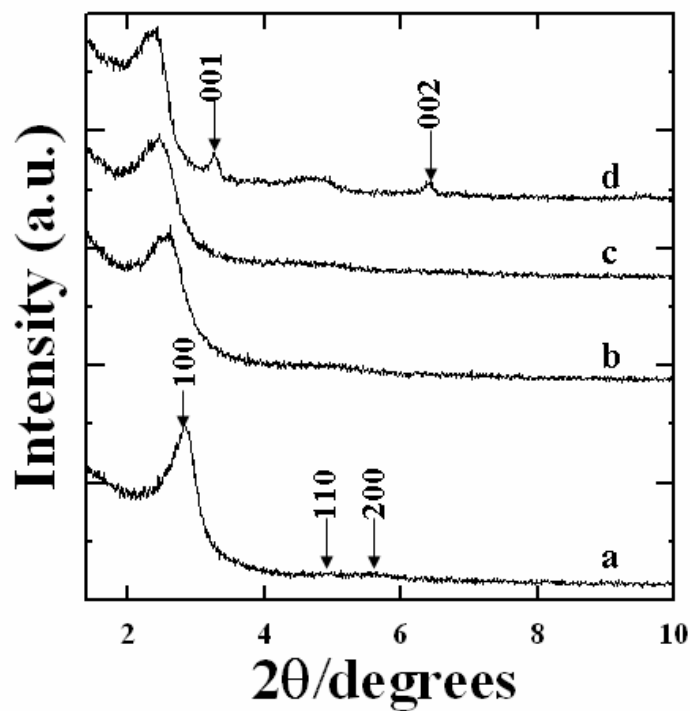

**S-Fig. 1** XRD patterns for as synthesized  $C_n$ -SCMS silica particles with (a)  $n = 12$ , (b)  $n = 14$ , (c)  $n = 16$ , and (d)  $n = 18$ , respectively.

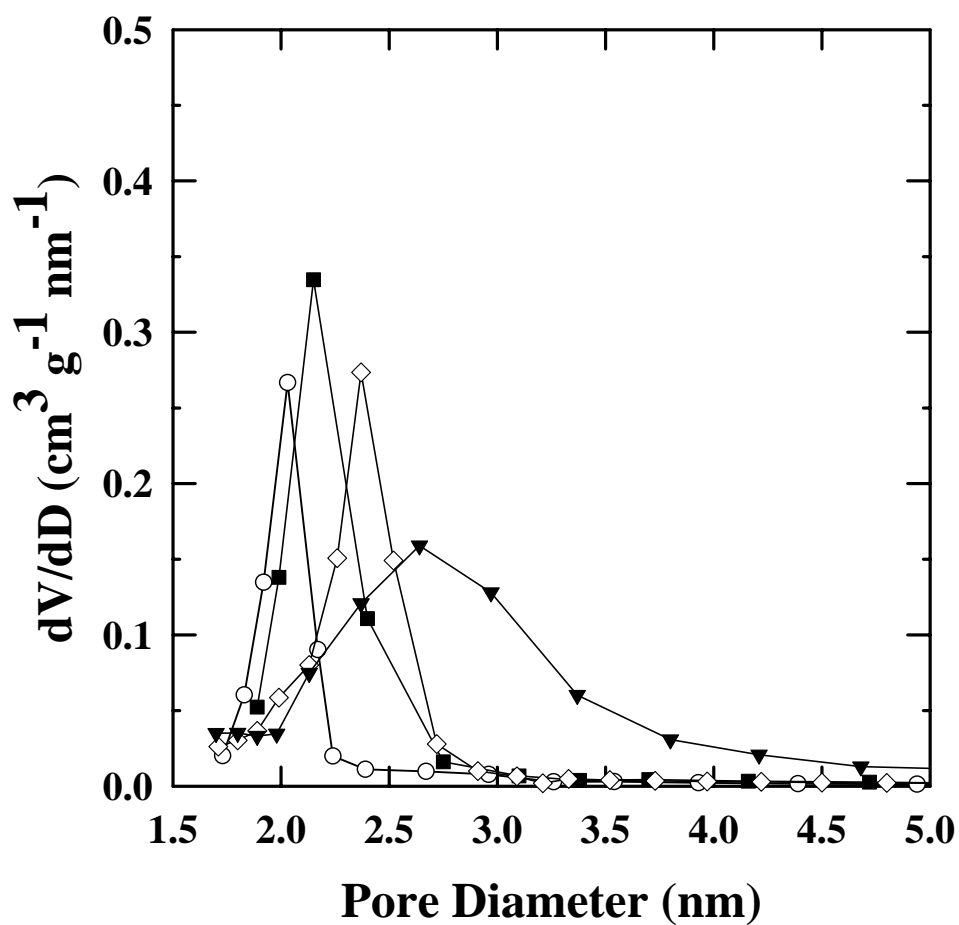

**S-Fig. 2** Pore size distribution curves calculated from the adsorption branch of the N<sub>2</sub> adsorption/desorption isotherms shown in Fig 5. (○) C<sub>12</sub>-SCMS, (■) C<sub>14</sub>-SCMS, (◇) C<sub>16</sub>-SCMS, and (▼) C<sub>18</sub>-SCMS, respectively.
